# Supplementary material for: Diagnostic accuracy and acceptability of molecular diagnosis of COVID-19 on saliva samples relative to nasopharyngeal swabs in tropical hospital and extra-hospital contexts: The COVISAL study
Source: PubMed Central journal article supplement (PMC8437265; doi:10.1371/journal.pone.0257169), 2021-09-13
Supplement: pone.0257169.s001.pdf [file pone.0257169.s001.pdf]

**Supplementary tables: 1-13**

*Page 2=>Supplementary table 1: Crosstabulation between willingness to repeat a nasopharyngeal test by sex.*

*Page 2=>Supplementary table 2: Crosstabulation between willingness to repeat a nasopharyngeal test by age group.*

*Page 3=>Supplementary table 3: Crosstabulation between willingness to repeat a nasopharyngeal test by inclusion site.*

*Page 3=>Supplementary table 4: Crosstabulation between saliva versus nasopharyngeal test preference by sex.*

*Page 4=>Supplementary table 5: Crosstabulation between saliva versus nasopharyngeal test preference by age group.*

*Page 4=>Supplementary table 6: Crosstabulation between willingness to repeat a saliva versus a nasopharyngeal test.*

*Page 5=>Supplementary table 7: Crosstabulation between motives for refusal to repeat a nasopharyngeal test by sex*

*Page 5=>Supplementary table 8: Crosstabulation between motives for refusal to repeat a nasopharyngeal test by inclusion site*

*Page 5=>Supplementary table 9: Crosstabulation between motives for refusal to repeat a nasopharyngeal test by age group*

*Page 6=>Supplementary table 10: Crosstabulation between motives for refusal to repeat a salivary test by sex*

*Page 6=>Supplementary table 11: Crosstabulation between motives for refusal to repeat a salivary test by sex*

*Page 7=>Supplementary table 12: Crosstabulation between feeling capable of preparing a salivary sample alone by sex*

*Page 8=>Supplementary table 13: Crosstabulation between between feeling capable of preparing a salivary sample alone by age group*

*Page 9=> Supplementary table 14: Crosstabulation between feeling capable of preparing a salivary sample alone by sampling site*

*Page 9=>Supplementary table 15: Discordance of result between nasopharyngeal and saliva sample by sampling location*

Supplementary table 1: Crosstabulation between willingness to repeat a nasopharyngeal test by sex.

|                                                                                               | Sex               |                     |                   |
|-----------------------------------------------------------------------------------------------|-------------------|---------------------|-------------------|
|                                                                                               | Males<br>N<br>(%) | Females<br>N<br>(%) | Total<br>N<br>(%) |
| <b>If your test was negative today, would you be willing to repeat a nasopharyngeal test?</b> |                   |                     |                   |
| Refuse                                                                                        | 63<br>13.94       | 120<br>20.87        | 183<br>17.82      |
| If necessary                                                                                  | 256<br>56.64      | 274<br>47.65        | 530<br>51.61      |
| I would want to do it again                                                                   | 59<br>13.05       | 60<br>10.43         | 119<br>11.59      |
| Doesn't know                                                                                  | 30<br>6.64        | 56<br>9.74          | 86<br>8.37        |
| Missing                                                                                       | 44<br>9.73        | 65<br>11.30         | 109<br>10.61      |
| Total                                                                                         | 452<br>100.00     | 575<br>100.00       | 1027<br>100.00    |

*Chi2 test, P=0.003*

Supplementary table 2: Crosstabulation between willingness to repeat a nasopharyngeal test by age group.

|                                                                                               | Age group             |                         |                       |                   |
|-----------------------------------------------------------------------------------------------|-----------------------|-------------------------|-----------------------|-------------------|
|                                                                                               | <20 years<br>N<br>(%) | 20-40 years<br>N<br>(%) | >40 years<br>N<br>(%) | Total<br>N<br>(%) |
| <b>If your test was negative today, would you be willing to repeat a nasopharyngeal test?</b> |                       |                         |                       |                   |
| Refuse                                                                                        | 49<br>23.56           | 95<br>21.49             | 39<br>10.34           | 183<br>17.82      |
| If necessary                                                                                  | 104<br>50.00          | 225<br>50.90            | 201<br>53.32          | 530<br>51.61      |
| I would want to do it again                                                                   | 27<br>12.98           | 46<br>10.41             | 46<br>12.20           | 119<br>11.59      |
| Doesn't know                                                                                  | 8<br>3.85             | 36<br>8.14              | 42<br>11.14           | 86<br>8.37        |
| Missing                                                                                       | 20<br>9.62            | 40<br>9.05              | 49<br>13.00           | 109<br>10.61      |
| Total                                                                                         | 208<br>100.00         | 442<br>100.00           | 377<br>100.00         | 1027<br>100.00    |

*Chi2 test: P<0.001*

Supplementary table 3: Crosstabulation between willingness to repeat a nasopharyngeal test by inclusion site.

| If your test was negative today, would you be willing to repeat a nasopharyngeal test? | Inclusion site                  |                                   |                                  |                             |                                | Total<br>N<br>(%) |
|----------------------------------------------------------------------------------------|---------------------------------|-----------------------------------|----------------------------------|-----------------------------|--------------------------------|-------------------|
|                                                                                        | Cayenne<br>hospital<br>N<br>(%) | Red Cross<br>outreach<br>N<br>(%) | Médecins<br>du Monde<br>N<br>(%) | Maripa<br>soula<br>N<br>(%) | Obstetrics<br>ward<br>N<br>(%) |                   |
| Refuse                                                                                 | 23<br>19.66                     | 7<br>43.75                        | 41<br>10.20                      | 70<br>17.16                 | 42<br>49.41                    | 183<br>17.80      |
| If necessary                                                                           | 47<br>40.17                     | 4<br>25.00                        | 232<br>57.71                     | 227<br>55.64                | 21<br>24.71                    | 531<br>51.65      |
| I would want to do it again                                                            | 13<br>11.11                     | 1<br>6.25                         | 80<br>19.90                      | 21<br>5.15                  | 4<br>4.71                      | 119<br>11.58      |
| Doesn't know                                                                           | 15<br>12.82                     | 2<br>12.50                        | 15<br>3.73                       | 42<br>10.29                 | 12<br>14.12                    | 86<br>8.37        |
| Missing                                                                                | 19<br>16.24                     | 2<br>12.50                        | 34<br>8.46                       | 48<br>11.76                 | 6<br>7.06                      | 109<br>10.60      |
| Total                                                                                  | 117<br>100.00                   | 16<br>100.00                      | 402<br>100.00                    | 408<br>100.00               | 85<br>100.00                   | 1028<br>100.00    |

Chi 2 test:  $P < 0.001$

Supplementary table 4: Crosstabulation between saliva versus nasopharyngeal test preference by sex.

| If the salivary test was validated, which test would you rather get? | Sex                             |                                 | Total<br>N<br>(%)                 |
|----------------------------------------------------------------------|---------------------------------|---------------------------------|-----------------------------------|
|                                                                      | Males<br>N<br>(%)               | Females<br>N<br>(%)             |                                   |
| None                                                                 | 1<br>12.50                      | 7<br>87.50                      | 8<br>100.00                       |
| Nasopharyngeal test                                                  | 0.22<br>62<br>54.39             | 1.22<br>52<br>45.61             | 0.78<br>114<br>100.00             |
| Salivary test                                                        | 13.72<br>278<br>41.25           | 9.04<br>396<br>58.75            | 11.10<br>674<br>100.00            |
| Does not know                                                        | 61.50<br>65<br>52.00            | 68.87<br>60<br>48.00            | 65.63<br>125<br>100.00            |
| Missing                                                              | 14.38<br>46<br>43.40            | 10.43<br>60<br>56.60            | 12.17<br>106<br>100.00            |
| Total                                                                | 10.18<br>452<br>44.01<br>100.00 | 10.43<br>575<br>55.99<br>100.00 | 10.32<br>1027<br>100.00<br>100.00 |

Chi2:  $P = 0.009$

Supplementary table 5: Crosstabulation between saliva versus nasopharyngeal test preference by age group.

|                                                                      | Age group                                   |                                             |                                             | Total                                         |
|----------------------------------------------------------------------|---------------------------------------------|---------------------------------------------|---------------------------------------------|-----------------------------------------------|
|                                                                      | <20 years                                   | 20-40 years                                 | >40 years                                   |                                               |
| If the salivary test was validated, which test would you rather get? | N (%)                                       | N (%)                                       | N (%)                                       | N (%)                                         |
| None                                                                 | 1<br>12.50<br>0.48                          | 3<br>37.50<br>0.68                          | 4<br>50.00<br>1.06                          | 8<br>100.00<br>0.78                           |
| Nasopharyngeal test                                                  | 22<br>19.30<br>10.58                        | 46<br>40.35<br>10.41                        | 46<br>40.35<br>12.20                        | 114<br>100.00<br>11.10                        |
| Salivary test                                                        | 153<br>22.70<br>73.56                       | 308<br>45.70<br>69.68                       | 213<br>31.60<br>56.50                       | 674<br>100.00<br>65.63                        |
| Does not know                                                        | 14<br>11.20<br>6.73                         | 45<br>36.00<br>10.18                        | 66<br>52.80<br>17.51                        | 125<br>100.00<br>12.17                        |
| Missing                                                              | 18<br>16.98<br>8.65                         | 40<br>37.74<br>9.05                         | 48<br>45.28<br>12.73                        | 106<br>100.00<br>10.32                        |
| <b>Total</b>                                                         | <b>208</b><br><b>20.25</b><br><b>100.00</b> | <b>442</b><br><b>43.04</b><br><b>100.00</b> | <b>377</b><br><b>36.71</b><br><b>100.00</b> | <b>1027</b><br><b>100.00</b><br><b>100.00</b> |

Chi2: P&lt;0.001

Supplementary table 6: Crosstabulation between willingness to repeat a saliva versus a nasopharyngeal test.

| If your test was negative, would you be willing to repeat a <u>salivary</u> test? | If your test was negative today would you be willing to repeat a <u>nasopharyngeal</u> test |                                             |                                             |                                           |                                             | Total                                         |
|-----------------------------------------------------------------------------------|---------------------------------------------------------------------------------------------|---------------------------------------------|---------------------------------------------|-------------------------------------------|---------------------------------------------|-----------------------------------------------|
|                                                                                   | Refuse                                                                                      | If necessary                                | I would want to do it again                 | Doesn't know                              | Missing                                     |                                               |
| Refuse                                                                            | 23<br>50.00<br>12.57                                                                        | 12<br>26.09<br>2.26                         | 11<br>23.91<br>9.24                         | 0<br>0.00<br>0.00                         | 0<br>0.00<br>0.00                           | 46<br>100.00<br>4.47                          |
| If necessary                                                                      | 89<br>15.27<br>48.63                                                                        | 455<br>78.04<br>85.69                       | 15<br>2.57<br>12.61                         | 23<br>3.95<br>26.74                       | 1<br>0.17<br>0.92                           | 583<br>100.00<br>56.71                        |
| I would want to do it again                                                       | 62<br>29.25<br>33.88                                                                        | 55<br>25.94<br>10.36                        | 90<br>42.45<br>75.63                        | 4<br>1.89<br>4.65                         | 1<br>0.47<br>0.92                           | 212<br>100.00<br>20.62                        |
| Doesn't know                                                                      | 6<br>8.22<br>3.28                                                                           | 7<br>9.59<br>1.32                           | 2<br>2.74<br>1.68                           | 56<br>76.71<br>65.12                      | 2<br>2.74<br>1.83                           | 73<br>100.00<br>7.10                          |
| Missing                                                                           | 3<br>2.63<br>1.64                                                                           | 2<br>1.75<br>0.38                           | 1<br>0.88<br>0.84                           | 3<br>2.63<br>3.49                         | 105<br>92.11<br>96.33                       | 114<br>100.00<br>11.09                        |
| <b>Total</b>                                                                      | <b>183</b><br><b>17.80</b><br><b>100.00</b>                                                 | <b>531</b><br><b>51.65</b><br><b>100.00</b> | <b>119</b><br><b>11.58</b><br><b>100.00</b> | <b>86</b><br><b>8.37</b><br><b>100.00</b> | <b>109</b><br><b>10.60</b><br><b>100.00</b> | <b>1028</b><br><b>100.00</b><br><b>100.00</b> |

Chi2: P&lt;0.001

**Supplementary table 7: Crosstabulation between motives for refusal to repeat a nasopharyngeal test by sex.**

| Why refuse another nasopharyngeal test? | Sex         |              |  | Total<br>N<br>(%) |
|-----------------------------------------|-------------|--------------|--|-------------------|
|                                         | Males       | Females      |  |                   |
|                                         | N<br>(%)    | N<br>(%)     |  |                   |
| Too much waiting                        | 8<br>61.54  | 5<br>38.46   |  | 13<br>100.00      |
| Too unpleasant                          | 52<br>37.68 | 86<br>62.32  |  | 138<br>100.00     |
| Anxiety waiting for result              | 0<br>0.00   | 4<br>100.00  |  | 4<br>100.00       |
| Other                                   | 4<br>40.00  | 6<br>60.00   |  | 10<br>100.00      |
| Total                                   | 64<br>38.79 | 101<br>61.21 |  | 165<br>100.00     |

Chi2: P=0.14

**Supplementary table 8: Crosstabulation between motives for refusal to repeat a nasopharyngeal test by inclusion site**

| Why refuse another nasopharyngeal test? | Inclusion site   |                    |                   |              |                 | Total<br>N<br>(%) |
|-----------------------------------------|------------------|--------------------|-------------------|--------------|-----------------|-------------------|
|                                         | Cayenne hospital | Red Cross outreach | Médecins du Monde | Maripa soula | Obstetrics ward |                   |
|                                         | N<br>(%)         | N<br>(%)           | N<br>(%)          | N<br>(%)     | N<br>(%)        |                   |
| Too much waiting                        | 2<br>15.38       | 1<br>7.69          | 5<br>38.46        | 5<br>38.46   | 0<br>0.00       | 13<br>100.00      |
| Too unpleasant                          | 21<br>15.22      | 3<br>2.17          | 23<br>16.67       | 57<br>41.30  | 34<br>24.64     | 138<br>100.00     |
| Anxiety waiting for result              | 1<br>25.00       | 0<br>0.00          | 0<br>0.00         | 2<br>50.00   | 1<br>25.00      | 4<br>100.00       |
| Other                                   | 6<br>60.00       | 0<br>0.00          | 3<br>30.00        | 1<br>10.00   | 0<br>0.00       | 10<br>100.00      |
| Total                                   | 30<br>18.18      | 4<br>2.42          | 31<br>18.79       | 65<br>39.39  | 35<br>21.21     | 165<br>100.00     |

Chi2: P=0.01

**Supplementary table 9: Crosstabulation between motives for refusal to repeat a nasopharyngeal test by age group**

| Why refuse another nasopharyngeal test? | Age group   |             |             | Total<br>N<br>(%) |
|-----------------------------------------|-------------|-------------|-------------|-------------------|
|                                         | <20 years   | 20-40 years | >40 years   |                   |
|                                         | N<br>(%)    | N<br>(%)    | N<br>(%)    |                   |
| Too much waiting                        | 4<br>30.77  | 6<br>46.15  | 3<br>23.08  | 13<br>100.00      |
| Too unpleasant                          | 35<br>25.36 | 77<br>55.80 | 26<br>18.84 | 138<br>100.00     |
| Anxiety waiting for result              | 0<br>0.00   | 4<br>100.00 | 0<br>0.00   | 4<br>100.00       |
| Other                                   | 0<br>0.00   | 1<br>10.00  | 9<br>90.00  | 10<br>100.00      |
| Total                                   | 39<br>23.64 | 88<br>53.33 | 38<br>23.03 | 165<br>100.00     |

Chi 2: P&lt;0.001

**Supplementary table 10: Crosstabulation between motives for refusal to repeat a salivary test by sex**

| Why would you refuse another salivary test? | Sex               |                     |                   |
|---------------------------------------------|-------------------|---------------------|-------------------|
|                                             | Males<br>N<br>(%) | Females<br>N<br>(%) | Total<br>N<br>(%) |
| Too much waiting                            | 8<br>47.06        | 9<br>52.94          | 17<br>100.00      |
| Too unpleasant                              | 12<br>38.71       | 19<br>61.29         | 31<br>100.00      |
| Anxiety waiting for result                  | 0<br>0.00         | 2<br>100.00         | 2<br>100.00       |
| Other                                       | 7<br>50.00        | 7<br>50.00          | 14<br>100.00      |
| Total                                       | 27<br>42.19       | 37<br>57.81         | 64<br>100.00      |

Chi 2: P=0.5

**Supplementary table 11: Crosstabulation between motives for refusal to repeat a salivary test by age group**

| Why would you refuse another salivary test? | Age group             |                         |                       | Total<br>N<br>(%) |
|---------------------------------------------|-----------------------|-------------------------|-----------------------|-------------------|
|                                             | <20 years<br>N<br>(%) | 20-40 years<br>N<br>(%) | >40 years<br>N<br>(%) |                   |
| Too much waiting                            | 3<br>17.65            | 10<br>58.82             | 4<br>23.53            | 17<br>100.00      |
| Too unpleasant                              | 6<br>19.35            | 15<br>48.39             | 10<br>32.26           | 31<br>100.00      |
| Anxiety waiting for result                  | 0<br>0.00             | 1<br>50.00              | 1<br>50.00            | 2<br>100.00       |
| Other                                       | 0<br>0.00             | 5<br>35.71              | 9<br>64.29            | 14<br>100.00      |
| Total                                       | 9<br>14.06            | 31<br>48.44             | 24<br>37.50           | 64<br>100.00      |

Chi2: P=0.25

Supplementary table 12: Crosstabulation between feeling capable of preparing a salivary sample alone by sex

| Would you feel capable of giving a saliva sample test on your own? | Sex                    |                        |                          |
|--------------------------------------------------------------------|------------------------|------------------------|--------------------------|
|                                                                    | Males<br>N<br>(%)      | Females<br>N<br>(%)    | Total<br>N<br>(%)        |
| No                                                                 | 27<br>49.09<br>5.97    | 28<br>50.91<br>4.87    | 55<br>100.00<br>5.36     |
| Yes, very easily                                                   | 272<br>44.59<br>60.18  | 338<br>55.41<br>58.78  | 610<br>100.00<br>59.40   |
| Yes, but uneasy about it                                           | 37<br>46.25<br>8.19    | 43<br>53.75<br>7.48    | 80<br>100.00<br>7.79     |
| Yes, with a nurse's help                                           | 16<br>48.48<br>3.54    | 17<br>51.52<br>2.96    | 33<br>100.00<br>3.21     |
| Maybe                                                              | 14<br>29.79<br>3.10    | 33<br>70.21<br>5.74    | 47<br>100.00<br>4.58     |
| Doesn't know                                                       | 40<br>46.51<br>8.85    | 46<br>53.49<br>8.00    | 86<br>100.00<br>8.37     |
| Missing                                                            | 46<br>39.66<br>10.18   | 70<br>60.34<br>12.17   | 116<br>100.00<br>11.30   |
| Total                                                              | 452<br>44.01<br>100.00 | 575<br>55.99<br>100.00 | 1027<br>100.00<br>100.00 |

Chi2: P=0.41

**Supplementary table 13: Crosstabulation between feeling capable of preparing a salivary sample alone by age group**

| Would you feel capable of producing a saliva sample on your own? | Age group             |                         |                       | Total<br>N<br>(%) |
|------------------------------------------------------------------|-----------------------|-------------------------|-----------------------|-------------------|
|                                                                  | <20 years<br>N<br>(%) | 20-40 years<br>N<br>(%) | >40 years<br>N<br>(%) |                   |
| No                                                               | 14                    | 23                      | 18                    | 55                |
|                                                                  | 25.45                 | 41.82                   | 32.73                 | 100.00            |
| Yes, very easily                                                 | 6.73                  | 5.20                    | 4.77                  | 5.36              |
|                                                                  | 124                   | 274                     | 212                   | 610               |
| Yes, but uneasy about it                                         | 20.33                 | 44.92                   | 34.75                 | 100.00            |
|                                                                  | 59.62                 | 61.99                   | 56.23                 | 59.40             |
| Yes, with a nurse's help                                         | 29                    | 27                      | 24                    | 80                |
|                                                                  | 36.25                 | 33.75                   | 30.00                 | 100.00            |
| Maybe                                                            | 13.94                 | 6.11                    | 6.37                  | 7.79              |
|                                                                  | 3                     | 12                      | 18                    | 33                |
| Doesn't know                                                     | 9.09                  | 36.36                   | 54.55                 | 100.00            |
|                                                                  | 1.44                  | 2.71                    | 4.77                  | 3.21              |
| Missing                                                          | 8                     | 23                      | 16                    | 47                |
|                                                                  | 17.02                 | 48.94                   | 34.04                 | 100.00            |
| Total                                                            | 3.85                  | 5.20                    | 4.24                  | 4.58              |
|                                                                  | 8                     | 38                      | 40                    | 86                |
| Total                                                            | 9.30                  | 44.19                   | 46.51                 | 100.00            |
|                                                                  | 3.85                  | 8.60                    | 10.61                 | 8.37              |
| Total                                                            | 22                    | 45                      | 49                    | 116               |
|                                                                  | 18.97                 | 38.79                   | 42.24                 | 100.00            |
| Total                                                            | 10.58                 | 10.18                   | 13.00                 | 11.30             |
|                                                                  | 208                   | 442                     | 377                   | 1027              |
| Total                                                            | 20.25                 | 43.04                   | 36.71                 | 100.00            |
|                                                                  | 100.00                | 100.00                  | 100.00                | 100.00            |

*Chi2: P=0.003*



**Supplementary table 14: Crosstabulation between feeling capable of preparing a salivary sample alone by sampling site**

| Would you feel capable of producing a saliva sample on your own? | Inclusion site   |                    |                   |              |                 | Total  |
|------------------------------------------------------------------|------------------|--------------------|-------------------|--------------|-----------------|--------|
|                                                                  | Cayenne hospital | Red Cross outreach | Médecins du Monde | Maripa soula | Obstetrics ward |        |
|                                                                  | N (%)            | N (%)              | N (%)             | N (%)        | N (%)           |        |
| No                                                               | 4                | 1                  | 19                | 27           | 4               | 55     |
|                                                                  | 7.27             | 1.82               | 34.55             | 49.09        | 7.27            | 100.00 |
|                                                                  | 3.42             | 6.25               | 4.73              | 6.62         | 4.71            | 5.35   |
| Yes, very easily                                                 | 65               | 9                  | 273               | 210          | 54              | 611    |
|                                                                  | 10.64            | 1.47               | 44.68             | 34.37        | 8.84            | 100.00 |
|                                                                  | 55.56            | 56.25              | 67.91             | 51.47        | 63.53           | 59.44  |
| Yes, but uneasy about it                                         | 9                | 0                  | 24                | 46           | 1               | 80     |
|                                                                  | 11.25            | 0.00               | 30.00             | 57.50        | 1.25            | 100.00 |
|                                                                  | 7.69             | 0.00               | 5.97              | 11.27        | 1.18            | 7.78   |
| Yes, with a nurse's help                                         | 7                | 1                  | 13                | 9            | 3               | 33     |
|                                                                  | 21.21            | 3.03               | 39.39             | 27.27        | 9.09            | 100.00 |
|                                                                  | 5.98             | 6.25               | 3.23              | 2.21         | 3.53            | 3.21   |
| Maybe                                                            | 3                | 3                  | 21                | 15           | 5               | 47     |
|                                                                  | 6.38             | 6.38               | 44.68             | 31.91        | 10.64           | 100.00 |
|                                                                  | 2.56             | 18.75              | 5.22              | 3.68         | 5.88            | 4.57   |
| Doesn't know                                                     | 7                | 1                  | 15                | 52           | 11              | 86     |
|                                                                  | 8.14             | 1.16               | 17.44             | 60.47        | 12.79           | 100.00 |
|                                                                  | 5.98             | 6.25               | 3.73              | 12.75        | 12.94           | 8.37   |
| Missing                                                          | 22               | 1                  | 37                | 49           | 7               | 116    |
|                                                                  | 18.97            | 0.86               | 31.90             | 42.24        | 6.03            | 100.00 |
|                                                                  | 18.80            | 6.25               | 9.20              | 12.01        | 8.24            | 11.28  |
| Total                                                            | 117              | 16                 | 402               | 408          | 85              | 1028   |
|                                                                  | 11.38            | 1.56               | 39.11             | 39.69        | 8.27            | 100.00 |
|                                                                  | 100.00           | 100.00             | 100.00            | 100.00       | 100.00          | 100.00 |

P<0.001

**Supplementary table 15: Discordance of result between nasopharyngeal and saliva sample by sampling location**

| Discordance          | Adjusted OR | [95% Confidence Interval] | p-value |
|----------------------|-------------|---------------------------|---------|
| Reference Cayenne    | -           | -                         | -       |
| Doctors of the World | 6.6         | 1.6-26.6                  | 0.008   |
| Maripasoula          | 1.1         | 0.3-3.8                   | 0.7     |
| Obstetrics           | -           | -                         | -       |
| Asymptomatic         | 9.9         | 5.1-19.2                  | 0.007   |
